# Supplementary material for: Beyond Formal Access: Organizational Context, Working From Home, and Work–Family Conflict of Men and Women in European Workplaces
Source: Springer Nature journal article supplement (doi:10.1007/s11205-018-1993-1), 2018-10-05
Supplement: MOESM1 [file 16178550]

Table A1. Hierarchical linear regression analyses of work-family conflict on working from home - partial and full gender interaction model

|                                                     | Model7                  | Model8              |
|-----------------------------------------------------|-------------------------|---------------------|
| Working from home (proportion of working month *10) | 0.01<br>(0.01)          | 0.004<br>(0.01)     |
| Managerial support                                  | -0.18***<br>(0.02)      | -0.18***<br>(0.02)  |
| Ideal worker culture                                | 0.3***<br>(0.02)        | 0.29***<br>(0.02)   |
| Proportion of co-workers working from home          | 0.01<br>(0.01)          | -0.01<br>(0.01)     |
| Working from home × Managerial support              | 0.01+<br>(0.01)         | 0.01+<br>(0.01)     |
| Working from home × Ideal worker culture            | 0.02+<br>(0.01)         | 0.01+<br>(0.01)     |
| Working from home × proportion of co-workers WFH    | 0.001<br>(0.003)        | 0.002<br>(0.003)    |
| Working from home × Female                          | 0.07***<br>(-0.02)      | 0.08***<br>(-0.02)  |
| Female gender                                       | -0.003<br>(0.03)        | -0.622*<br>(0.296)  |
| Supervisory position                                | 0.17***<br>(0.02)       | 0.16***<br>(0.03)   |
| Job autonomy                                        | 0.07***<br>(0.01)       | 0.095***<br>(0.01)  |
| Organizational tenure (years)                       | 0.002<br>(0.001)        | 0.004*<br>(0.002)   |
| Flexible schedule (0/1)                             | 0.003<br>(0.02)         | 0.021<br>(0.03)     |
| Contracted hours (sqrt)                             | 0.12***<br>(0.01)       | 0.12***<br>(0.02)   |
| Commuting time (sqrt)                               | 0.04***<br>(0.005)      | 0.04***<br>(0.007)  |
| Higher educated                                     | 0.03<br>(-0.02)         | 0.04<br>(-0.03)     |
| Age                                                 | 0.02*<br>(0.01)         | 0.01<br>(0.01)      |
| Age2                                                | -0.0002***<br>(0.00007) | -0.0001<br>(0.0001) |
| Having a partner                                    | 0.06***<br>(0.02)       | 0.07*<br>(0.03)     |
| Having a young child                                | 0.001<br>(0.02)         | 0.039<br>(0.03)     |
| Hours of domestic work (sqrt)                       | 0.03***<br>(0.01)       | 0.01<br>(0.01)      |
| Organization size (log)                             | -0.01<br>(0.01)         | -0.02<br>(0.01)     |
| Managerial support × Female                         | 0.02<br>(0.02)          | 0.01<br>(0.02)      |
| Ideal worker culture × Female                       | -0.01                   | 0.001               |

|                                                               | Model7   | Model8   |
|---------------------------------------------------------------|----------|----------|
|                                                               | (-0.02)  | (-0.02)  |
| Proportion of co-workers working from home × Female           | 0.01     | 0.04***  |
|                                                               | (0.01)   | (0.01)   |
| Working from home × Managerial support × Female               | -0.02+   | -0.02+   |
|                                                               | (0.01)   | (0.01)   |
| Working from home × Ideal worker culture × Female             | -0.01    | -0.004   |
|                                                               | (0.01)   | (0.01)   |
| Working from home × Pr. co-workers working from home × Female | -0.01+   | -0.01*   |
|                                                               | (0.005)  | (0.005)  |
| Autonomy × Female                                             |          | -0.04+   |
|                                                               |          | (0.02)   |
| Higher educated × Female                                      |          | -0.02    |
|                                                               |          | (0.04)   |
| Commuting time (sqrt) × Female                                |          | -0.0001  |
|                                                               |          | (0.01)   |
| Flexible schedule (0/1) × Female                              |          | -0.04    |
|                                                               |          | (0.04)   |
| Contracted hours (sqrt) × Female                              |          | -0.01    |
|                                                               |          | (0.02)   |
| Supervisory position × Female                                 |          | 0.03     |
|                                                               |          | (0.04)   |
| Organizational tenure (years) × Female                        |          | -0.004*  |
|                                                               |          | (0.002)  |
| Age × Female                                                  |          | 0.01     |
|                                                               |          | (0.01)   |
| Age2 × Female                                                 |          | 0.000    |
|                                                               |          | (0.001)  |
| Having a partner × Female                                     |          | -0.02    |
|                                                               |          | (0.04)   |
| Having a young child × Female                                 |          | -0.06    |
|                                                               |          | (0.04)   |
| Hours of domestic work (sqrt) × Female                        |          | 0.04*    |
|                                                               |          | (0.01)   |
| Organization size (log) × Female                              |          | 0.03*    |
|                                                               |          | (0.01)   |
| Intercept                                                     | -1.53*** | -1.12*** |
|                                                               | (0.16)   | (0.23)   |
| σ(organization)                                               | 0.14***  | 0.14***  |
|                                                               | (0.02)   | (0.02)   |
| σ(work unit)                                                  | 0.15***  | 0.14***  |
|                                                               | (0.01)   | (0.01)   |
| σ(Residual)                                                   | 0.8***   | 0.8***   |
|                                                               | (0.01)   | (0.01)   |
| Number of employees                                           | 11011    | 11011    |
| Number of work units                                          | 868      | 868      |
| Number of organizations                                       | 257      | 257      |

Notes: † p<0.10 \* p<0.05 \*\* p<0.01 \*\*\* p<0.01 (2-sided). Estimated on multiple imputed data (M=10). Standard errors corrected. Models include indicators for country sector and survey mode, interacted with gender (Model 8). Source: ESWS
